# Supplementary material for: Dealloyed Porous NiFe2O4/NiO with Dual-Network Structure as High-Performance Anodes for Lithium-Ion Batteries
Source: MDPI journal article supplement (doi:10.3390/ijms24044152), 2023-02-19
Supplement: s1 [file s1]

## Supporting information

# Dealloyed Porous NiFe<sub>2</sub>O<sub>4</sub>/NiO with Dual-Network Structure as High-Performance Anodes for Lithium-Ion Batteries

Chao Jin <sup>1,2,†</sup>, Zigang Wang <sup>1,†</sup>, Chang Luo <sup>1</sup>, Chunling Qin <sup>1</sup>, Yongyan Li <sup>1,\*</sup> and Zhifeng Wang <sup>1,2,\*</sup>

<sup>1</sup> School of Materials Science and Engineering, Hebei University of Technology, Tianjin 300401, China

<sup>2</sup> Key Laboratory for New Type of Functional Materials in Hebei Province, Hebei University of Technology, Tianjin 300401, China

Correspondence: liyongyan@hebut.edu.cn (Y.L.); wangzf@hebut.edu.cn (Z.W.)

† These authors contributed equally to this work.

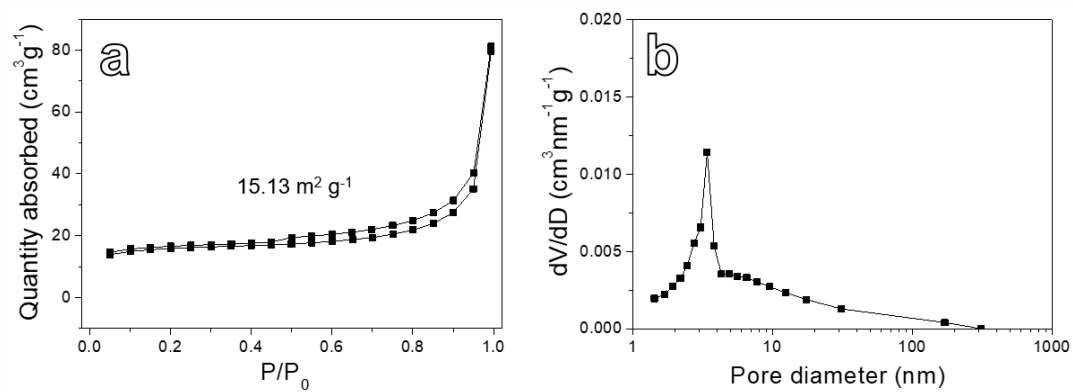

Figure S1.  $N_2$  adsorption-desorption isotherm of the D12 sample (a) and corresponding pore size distribution (b)

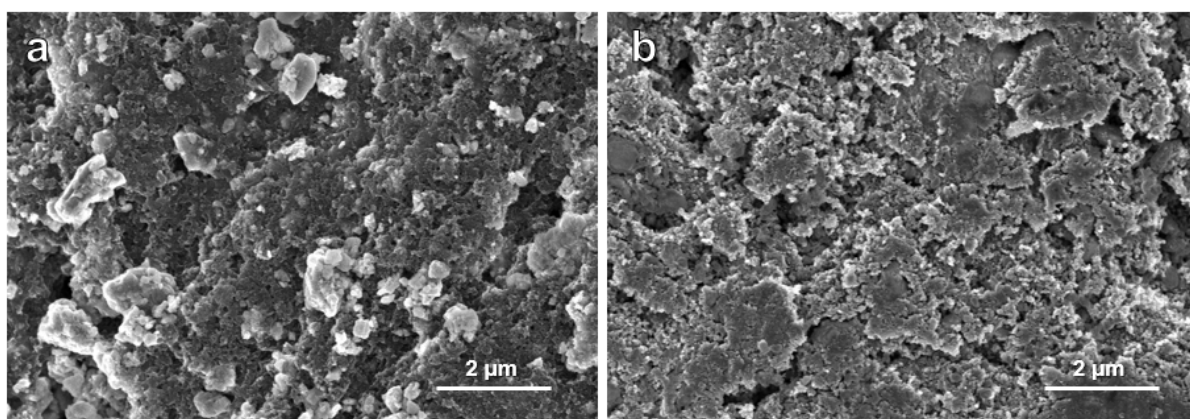

Figure S2. SEM images of the fresh electrodes: (a) D12. (b) D5.

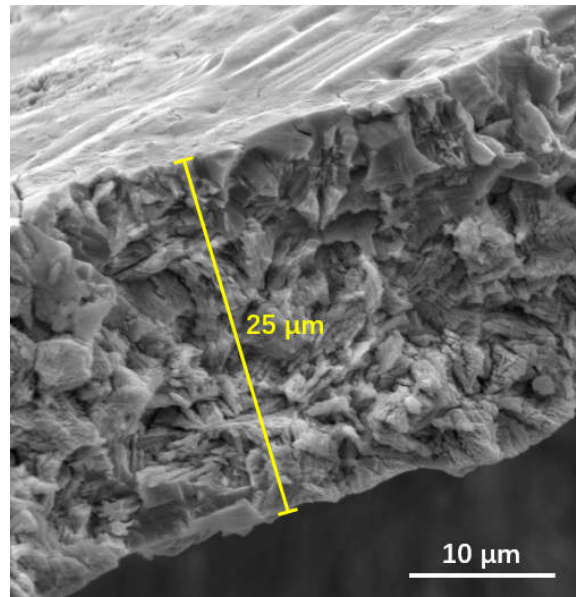

Figure S3. Cross-sectional SEM image of the original ribbon

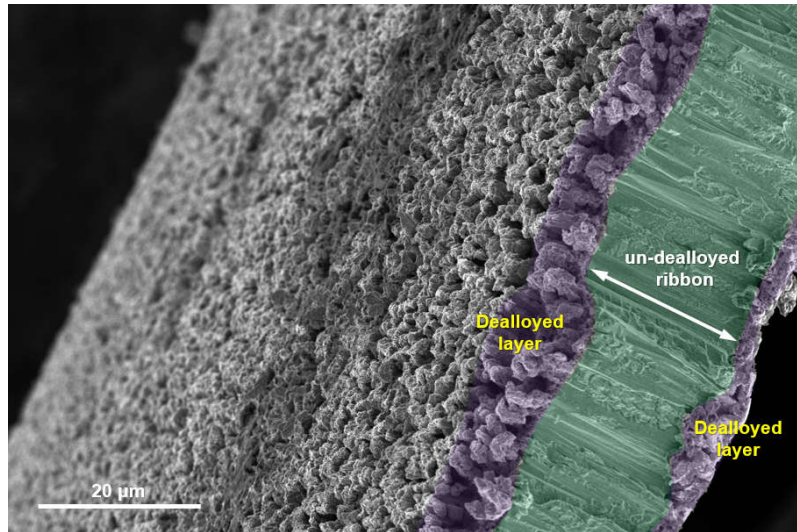

Figure S4. Cross-sectional SEM image of the dealloyed ribbon with etching time of 2 hours
